# Supplementary material
Source: publisher figshare collection journal article supplement (https://diabetesjournals.figshare.com/ndownloader/files/30930274)
Supplement: Supplementary file 1 [file 30930274]

## **Online-Only Supplementary Material**

### **Demographic Correlates of Short-Term Mortality among Youth and Young Adults with Youth-Onset Diabetes Diagnosed from 2002-2015: The SEARCH for Diabetes in Youth Study**

Jean M Lawrence, ScD; Kristi Reynolds, PhD; Sharon H Saydah, PhD; Amy Mottl, MD; Catherine Pihoker, MD; Dana Dabelea, MD, PhD; Lawrence Dolan, MD; Leora Henkin, MPH, MEd; Angela D Liese, PhD; Scott Isom, MS; Jasmin Divers, PhD; Lynne Wagenknecht, PhD for the SEARCH for Diabetes in Youth Study Group

Supplementary Table S1: Characteristics of the 20,150 Incident Diabetes Cases Diagnosed from 2002-2015 by Inclusion in the NDI Search: The SEARCH for Diabetes in Youth Study.

Supplementary Table S2: Demographic Characteristics of the 283 Decedents with Youth-Onset Diabetes Diagnosed from 2002-2015 that Died on or before 12/31/2017 by Diabetes Type: The SEARCH for Diabetes in Youth Study

Supplementary Table S3. Underlying Cause of Death for 188 Decedents for 2002-2015 Incident Diabetes Cases through 12/31/2017 with Type 1 or Type 2 Diabetes by Diabetes Type and Sex: The SEARCH for Diabetes in Youth Study

Supplementary Figure S1. Time from Diagnosis to Death or Censor by Diabetes Type: The SEARCH for Diabetes in Youth Study

The SEARCH for Diabetes in Youth Study Group List (Appendix)

Supplementary Table S1: Characteristics of the 20,150 Incident Diabetes Cases Diagnosed from 2002-2015 by Inclusion in the NDI Search: The SEARCH for Diabetes in Youth Study.

|                                  | <b>Total</b> | <b>Sent to NDI for Linkage</b> |              |
|----------------------------------|--------------|--------------------------------|--------------|
|                                  |              | <b>No</b>                      | <b>Yes</b>   |
| N                                | 20,150       | 433                            | 19,717       |
| Age at Diagnosis, Mean (SD) yrs. | 11.2 (4.7)   | 14.0 (4.5)                     | 11.1 (4.6)   |
| Age (on 12/31/17) Mean (SD) yrs. | 20.0 (6.0)   | 27.1 (4.8)                     | 19.8 (6.0)   |
| Sex, N (%)                       |              |                                |              |
| Female                           | 10155 (50.4) | 220 (50.8)                     | 9935 (50.4)  |
| Male                             | 9993 (49.6)  | 213 (49.2)                     | 9780 (49.6)  |
| Diabetes Type N (%)              |              |                                |              |
| Type 1                           | 14952 (74.2) | 231 (53.3)                     | 14721 (74.7) |
| Type 2                           | 4312 (21.4)  | 171 (39.5)                     | 4141 (21.0)  |
| Secondary diabetes               | 555 (2.8)    | 4 (0.9)                        | 551 (2.8)    |
| Other/Unknown diabetes type      | 331 (1.6)    | 27 (6.2)                       | 304 (1.5)    |
| Race/Ethnicity N (%)             |              |                                |              |
| Non-Hispanic White               | 11347 (56.3) | 170 (39.3)                     | 11177 (56.7) |
| Non-Hispanic Black               | 3670 (18.2)  | 94 (21.7)                      | 3576 (18.1)  |
| Hispanic                         | 3514 (17.4)  | 16 (3.7)                       | 3498 (17.7)  |
| Asian/Pacific Islander           | 628 (3.1)    | 10 (2.3)                       | 618 (3.1)    |
| Native American                  | 357 (1.8)    | 4 (0.9)                        | 353 (1.8)    |
| Other race                       | 240 (1.2)    | 14 (3.2)                       | 226 (1.1)    |
| Unknown race/ethnicity           | 394 (2.0)    | 125 (28.9)                     | 269 (1.4)    |
| Year of Diagnosis, N (%)         |              |                                |              |
| 2002-2005                        | 5278 (26.2)  | 317 (73.2)                     | 4961 (25.2)  |
| 2006-2010                        | 7209 (35.8)  | 104 (24.0)                     | 7105 (36.0)  |
| 2011-2015                        | 7663 (38.0)  | 12 (2.8)                       | 7651 (38.8)  |

NDI , National Death Index SD, standard deviation

Supplementary Table S2: Demographic Characteristics of the 283 Decedents with Youth-Onset Diabetes Diagnosed from 2002-2015 that Died on or before 12/31/2017 by Diabetes Type: The SEARCH for Diabetes in Youth Study

|                                             | Diabetes Type |            |            |                   |
|---------------------------------------------|---------------|------------|------------|-------------------|
|                                             | Type 1        | Type 2     | Secondary  | Other/<br>unknown |
| Decedents, N                                | 133           | 55         | 87         | 8                 |
| Age at Diagnosis, Mean (SD) yrs.            | 12.3 (4.1)    | 15.4 (3.0) | 14.5 (3.6) | 15.7 (3.5)        |
| Age at Diagnosis, n (%) yrs.                |               |            |            |                   |
| 0-4                                         | 11 (8.3)      | 1 (1.8)    | 3 (3.4)    | 0                 |
| 5-9                                         | 19 (14.3)     | 2 (3.6)    | 6 (6.9)    | 1 (12.5)          |
| 10-14                                       | 68 (51.1)     | 17 (30.9)  | 34 (39.1)  | 0                 |
| 15-19                                       | 35 (26.3)     | 35 (63.6)  | 44 (50.6)  | 7 (87.5)          |
| Sex , n (%)                                 |               |            |            |                   |
| Female                                      | 58 (43.6)     | 21 (38.2)  | 57 (65.5)  | 5 (62.5)          |
| Male                                        | 75 (56.4)     | 34 (61.8)  | 30 (34.5)  | 3 (37.5)          |
| Race/Ethnicity, n (%)                       |               |            |            |                   |
| Non-Hispanic White                          | 88 (66.2)     | 7 (12.7)   | 48 (55.2)  | 2 (25.0)          |
| Non-Hispanic Black                          | 22 (16.5)     | 27 (49.1)  | 23 (26.4)  | 2 (25.0)          |
| Hispanic                                    | 19 (14.3)     | 11 (20.0)  | 11 (12.6)  | 3 (37.5)          |
| Other/Unknown                               | 4 (3.0)       | 10 (18.2)  | 5 (5.7)    | 1 (12.5)          |
| Year of Diagnosis, n (%)                    |               |            |            |                   |
| 2002-2005                                   | 76 (57.1)     | 34 (61.8)  | 37 (42.5)  | 3 (37.5)          |
| 2006-2010                                   | 36 (27.1)     | 14 (25.5)  | 38 (43.7)  | 3 (37.5)          |
| 2011-2015                                   | 21 (15.8)     | 7 (12.7)   | 12 (13.8)  | 2 (25.0)          |
| Diabetes duration at death, Mean (SD), yrs. | 7.4 (4.5)     | 6.6 (4.2)  | 4.4 (3.7)  | 3.9 (4.6)         |
| Age at death, Mean (SD), yrs.               | 19.6 (5.5)    | 22.1 (5.0) | 18.9 (5.0) | 19.6 (6.6)        |
| Age at death, n (%)                         |               |            |            |                   |
| < 15 years                                  | 20 (15.2)     | 2 (3.7)    | 16 (18.4)  | 1 (12.5)          |
| 15-19 year                                  | 50 (37.9)     | 15 (27.8)  | 36 (41.4)  | 4 (50.0)          |
| 20-24 year                                  | 40 (30.3)     | 23 (42.6)  | 25 (28.7)  | 1 (12.5)          |
| 25-29 year                                  | 20 (15.2)     | 11 (20.4)  | 10 (11.5)  | 2 (25.0)          |
| 30-34 year                                  | 2 (1.5)       | 3 (5.6)    | 0          | 0                 |

SD, Standard Deviation

Supplementary Table S3. Underlying Cause of Death for 188 Decedents for 2002-2015 Incident Diabetes Cases through 12/31/2017 with Type 1 or Type 2 Diabetes by Diabetes Type and Sex: The SEARCH for Diabetes in Youth Study

|                                                                                         | ICD-10 codes   | Type 1 Diabetes  |                  | Type 2 Diabetes |                  |
|-----------------------------------------------------------------------------------------|----------------|------------------|------------------|-----------------|------------------|
|                                                                                         |                | Female           | Male             | Female          | Male             |
|                                                                                         |                | N (%)            | N (%)            | N (%)           | N (%)            |
| Deaths from All Causes, N                                                               | --             | 58               | 75               | 21              | 34               |
| <b>UNDERLYING CAUSE OF DEATH</b>                                                        |                |                  |                  |                 |                  |
| Certain infection and parasitic disease                                                 | A00-B99        | 1 (1.7)          | 0 (0.0)          | 2 (9.5)         | 0 (0.0)          |
| Cancer / neoplasms                                                                      | C00-D48        | 0 (0.0)          | 1 (1.3)          | 2 (9.5)         | 4 (11.8)         |
| Diseases of the blood and blood-forming organs                                          | D50-D89        | 1 (1.7)          | 0 (0.0)          | 2 (9.5)         | 0 (0.0)          |
| <b>Diabetes mellitus</b>                                                                | <b>E00-E14</b> | <b>23 (39.7)</b> | <b>33 (44.0)</b> | <b>2 (9.5)</b>  | <b>3 (8.8)</b>   |
| Metabolic disorders                                                                     | E15-E99        | 0 (0.0)          | 0 (0.0)          | 0 (0.0)         | 1 (2.9)          |
| Mental and behavioral disorders                                                         | F01-F99        | 0 (0.0)          | 0 (0.0)          | 1 (4.8)         | 0 (0.0)          |
| Diseases of the nervous system                                                          | G00-G98        | 6 (10.3)         | 2 (2.7)          | 2 (9.5)         | 2 (5.9)          |
| Diseases of the circulatory system                                                      | I00-I99        | 5 (8.6)          | 1 (1.3)          | 1 (4.8)         | 4 (11.8)         |
| Diseases of the respiratory system                                                      | J00-J98        | 2 (3.4)          | 0 (0.0)          | 1 (4.8)         | 1 (2.9)          |
| Diseases of the digestive system                                                        | K00-K92        | 0 (0.0)          | 0 (0.0)          | 0 (0.0)         | 1 (2.9)          |
| Diseases of the musculoskeletal system and connective tissue                            | M00-M99        | 0 (0.0)          | 1 (1.3)          | 0 (0.0)         | 0 (0.0)          |
| Diseases of the genitourinary system                                                    | N00-N98        | 1 (1.7)          | 0 (0.0)          | 0 (0.0)         | 1 (2.9)          |
| Certain conditions originating in the perinatal period                                  | P00-P96        | 0 (0.0)          | 1 (1.3)          | 0 (0.0)         | 0 (0.0)          |
| Congenital malformations, deformations and chromosomal abnormalities                    | Q00-Q99        | 0 (0.0)          | 1 (1.3)          | 0 (0.0)         | 4 (11.8)         |
| Symptoms, signs and abnormal clinical and laboratory findings, not elsewhere classified | R00-R99        | 1 (1.7)          | 1 (1.3)          | 0 (0.0)         | 0 (0.0)          |
| <b>External causes of morbidity and mortality</b>                                       | <b>V00-Y89</b> | <b>17 (29.3)</b> | <b>32 (42.7)</b> | <b>8 (38.1)</b> | <b>11 (32.4)</b> |
| Unknown cause of death reported to study†                                               | Unknown        | 1 (1.7)          | 2 (2.7)          | 0 (0.0)         | 2 (5.9)          |
| <b>CONTRIBUTING CAUSE OF DEATH</b>                                                      |                |                  |                  |                 |                  |
| Diabetes                                                                                | E00-E14        | 6 (10.3)         | 8 (10.7)         | 2 (9.5)         | 5 (14.7)         |

†Reported as deceased by the family or medical care providers but were not matched due to non-linkage with the National Death Index.

Supplementary Figure S1. Time from Diagnosis to Death or Censor by Diabetes Type: The SEARCH for Diabetes in Youth Study

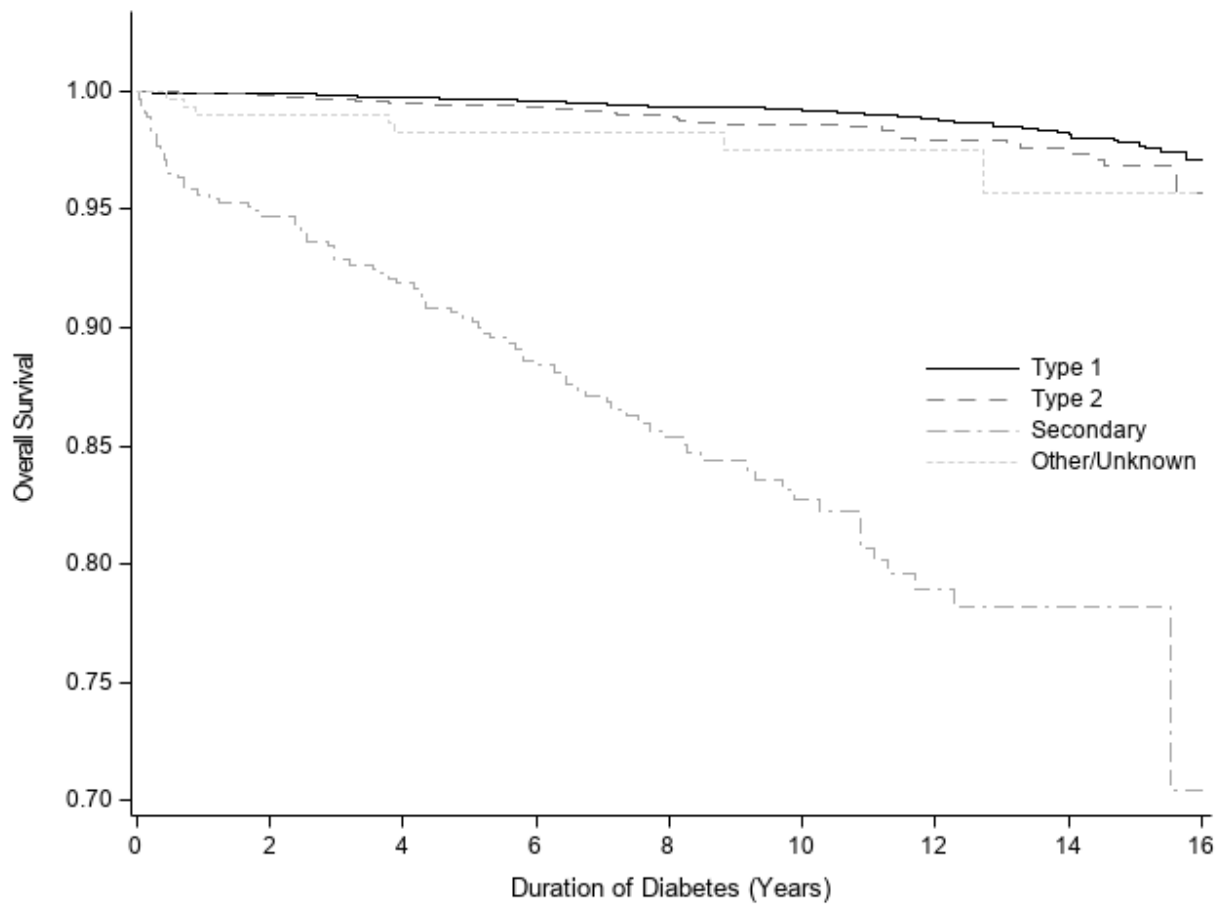

APPENDIX  
**The SEARCH for Diabetes in Youth Study Group**

The writing group acknowledges the contributions of the following individuals to the SEARCH for Diabetes in Youth Study. The Principal Investigator (PI) is listed first followed by other individuals on the study team in alphabetical order for each site:

**California: (PI)** Jean M. Lawrence, ScD, MPH, MSSA \*

Peggy Hung, MPH; Corinna Koebnick, PhD, MSc; Xia Li, MS; Eva Lustigova, MPH; Kristi Reynolds, PhD, MPH for the Department of Research & Evaluation, Kaiser Permanente Southern California, Pasadena California, and David J. Pettitt, MD, Santa Barbara, California.

\*Dr. Lawrence is now with the National Institute of Diabetes and Digestive and Kidney Diseases (as of November 2020).

**Carolinas: (PI)** Elizabeth J. Mayer-Davis, PhD

Amy Mottl, MD, MPH; Joan Thomas MS, RD for the University of North Carolina, Chapel Hill.

Malaka Jackson, MD; Lisa Knight, MD; Angela D. Liese, PhD, MPH; Christine Turley, MD for the University of South Carolina.

Deborah Bowlby, MD for the Medical University of South Carolina.

James Amrhein, MD; Elaine Apperson, MD; Bryce Nelson, MD for Greenville Health System and Eau Claire Cooperative Health Center.

**Colorado: (PI)** Dana Dabelea, MD, PhD

Anna Bellatorre, PhD; Tessa Crume, PhD, MSPH; Richard F. Hamman, MD, DrPH; Katherine A. Sauder, PhD; Allison Shapiro, PhD, MPH; Lisa Testaverde, MS for the LEAD Center in the Department of Epidemiology, Colorado School of Public Health, University of Colorado Denver.

Georgeanna J. Klingensmith, MD; David Maahs, MD; Marian J. Rewers, MD, PhD; Paul Wadwa, MD for the Barbara Davis Center for Childhood Diabetes.

Stephen Daniels, MD, PhD; Michael G. Kahn, MD, PhD; Greta Wilkening, PsyD for the Department of Pediatrics and Children's Hospital.

Clifford A. Bloch, MD for the Pediatric Endocrine Associates.

Jeffrey Powell, MD, MPH for the Shiprock Service Unit, Navajo Area Indian Health Service.

Kathy Love-Osborne, MD for the Denver Health and Hospital Authority.

Diana C. Hu, MD for the Pediatrics Department, Tuba City Regional Health Care Center, Tuba City, AZ.

**Ohio: (PI)** Lawrence M. Dolan, MD

Amy S. Shah, MD, MS; Debra A. Standiford, MSN, CNP; Elaine M. Urbina, MD, MS for the Cincinnati Children's Hospital Medical Center, Department of Pediatrics, University of Cincinnati.

**Washington: (PI)** Catherine Pihoker, MD

Irl Hirsch, MD; Grace Kim, MD; Faisal Malik, MD, MSHS; Lina Merjaneh, MD; Alissa Roberts, MD; Craig Taplin, MD; Joyce Yi-Frazier, PhD for the University of Washington.

Natalie Beauregard, BA; Cordelia Franklin, BS; Carlo Gangan, BA; Sue Kearns, RN; Mary Klingsheim, RN; Beth Loots, MPH, MSW; Michael Pascual, BA for Seattle Children's Hospital.

Carla Greenbaum, MD for Benaroya Research Institute.

**Central Laboratory: (PI)** Santica M. Marcovina, PhD, ScD (PI)

Alan Chait, MD; Noemie Clouet-Foraison, PhD; Jessica Harting; Greg Strylewicz, PhD for the University of Washington Northwest Lipid Metabolism and Diabetes Research Laboratories.

**Coordinating Center: (Co-PIs)** Ralph D'Agostino, Jr., PhD, Elizabeth T. Jensen, MPH, PhD; Lynne E. Wagenknecht, DrPH

Ramon Casanova, PhD; Jasmin Divers, PhD; Maureen T. Goldstein, BA; Leora Henkin, MPH, MEd; Scott Isom, MS; Kristin Lenoir, MPH; June Pierce, AB; Beth Reboussin, PhD; Joseph Rigdon, PhD; Andrew Michael South, MD, MS; Jeanette Stafford, MS; Cynthia Suerken, MS; Brian Wells, MD, PhD; Carrie Williams, MA, CCRP for Wake Forest School of Medicine.

**Centers for Disease Control and Prevention:** Giuseppina Imperatore, MD, PhD, Sharon H. Saydah, PhD

**National Institute of Diabetes and Digestive and Kidney Diseases:** Barbara Linder, MD,
